# Supplementary material
Source: publisher figshare collection journal article supplement (https://sage.figshare.com/ndownloader/files/17059337)
Supplement: Supplementary file 1 [file 17059337]

**Study 1 (Very close to emotionally/Not very close to emotionally, Preparing to conceive a child/ Preparing to adopt a child)**

**Life or Death Condition**

Please complete the following survey. There are no right or wrong answers; we are simply interested in getting a pool of responses. All your responses are confidential. No one will find out your response and it will not be identified in connection to your name.

Imagine the following scenario:

Imagine that four of your family members are asleep in a burning building and require your help to escape. If you do not help them, they will surely die. Imagine that you can only help one person at a time escape the building. The longer each member stays in the building without your help, the greater the chance they will die in the fire. Please read the descriptions of each family member. In the space next to the description, please rank each member from first (1) to last (4), in the order you will help them escape the building.

1 = help this person first; 2 = help this person second; 3 = help this person third; 4 = help this person last

\_\_\_\_\_ A female cousin you are very emotionally close to; she is preparing to conceive a child.

\_\_\_\_\_ A female cousin you are not very emotionally close to; she is preparing to conceive a child.

\_\_\_\_\_ A female cousin you are very emotionally close to; she is preparing to adopt a child.

\_\_\_\_\_ A female cousin you are not very emotionally close to; she is preparing to adopt a child.

CANCEL

NEXT

Out of the four cousins, you have indicated that would help this cousin first:  
**(participant's 1<sup>st</sup> choice will be displayed here)**

## Everyday Help Condition

Please complete the following survey. There are no right or wrong answers. We are simply interested in getting a pool of responses. All your responses are confidential. No one will find out your response and it will not be identified in connection to your name.

Imagine the following scenario:

Imagine that four of your family members require your help to run some important errands. If you do not help them, they will not be able to complete these tasks. You can only help one person at a time. The longer it takes you to help each person, the greater the chance they will not be able to complete their important errands. Please read the descriptions of each family member. In the space next to the description, please rank each member from first (1) to last (4), in the order you will help them with their errands.

1 = help this person first; 2 = help this person second; 3 = help this person third; 4 = help this person last

\_\_\_\_\_ A female cousin you are very emotionally close to; she is preparing to conceive a child.

\_\_\_\_\_ A female cousin you are not very emotionally close to; she is preparing to conceive a child.

\_\_\_\_\_ A female cousin you are very emotionally close to; she is preparing to adopt a child.

\_\_\_\_\_ A female cousin you are not very emotionally close to; she is preparing to adopt a child.

CANCEL

NEXT

**Study 2 (Very close to emotionally/Not very close to emotionally, 95% Chance of being able to conceive a child/95% Chance of not being able to conceive a child)**

**Life or Death Condition**

Please complete the following survey. There are no right or wrong answers; we are simply interested in getting a pool of responses. All your responses are confidential. No one will find out your response and it will not be identified in connection to your name.

Imagine the following scenario:

Imagine that four of your family members are asleep in a burning building and require your help to escape. If you do not help them, they will surely die. Imagine that you can only help one person at a time escape the building. The longer each member stays in the building without your help, the greater the chance they will die in the fire. Please read the descriptions of each family member. In the space next to the description, please rank each member from first (1) to last (4), in the order you will help them escape the building.

1 = help this person first; 2 = help this person second; 3 = help this person third; 4 = help this person last

- \_\_\_\_\_ A female cousin you are very close to emotionally, who has a 95% chance of being able to conceive a child.
- \_\_\_\_\_ A female cousin you are not very close to emotionally, who has a 95% chance of being able to conceive a child.
- \_\_\_\_\_ A female cousin you are very close to emotionally, who has a 95% chance of not being able to conceive a child.
- \_\_\_\_\_ A female cousin you are not very close to emotionally, who has a 95% chance of not being able to conceive a child.

CANCEL

NEXT

In the spaces provided, please tell us a little about what you were thinking when deciding which cousin to help in order (e.g. the ranking you gave person and the way you felt about each person). This will help us better understand decision making in complex scenarios. Again, there are no right answers and your responses are completely confidential.

1) (participant's 1<sup>st</sup> choice will be displayed here)

2) (participant's 2<sup>nd</sup> choice will be displayed here)

3) (participant's choice 3<sup>rd</sup> will be displayed here)

4) (participant's 4<sup>th</sup> choice will be displayed here)

CANCEL

NEXT

## Everyday Help Condition

### Scenario #1

Please complete the following survey. There are no right or wrong answers. We are simply interested in getting a pool of responses. All your responses are confidential. No one will find out your response and it will not be identified in connection to your name.

Imagine the following scenario:

Imagine that four of your family members require your help to run some important errands. If you do not help them, they will not be able to complete these tasks. You can only help one person at a time. The longer it takes you to help each person, the greater the chance they will not be able to complete their important errands. Please read the descriptions of each family member. In the space next to the description, please rank each member from first (1) to last (4), in the order you will help them with their errands.

1 = help this person first; 2 = help this person second; 3 = help this person third; 4 = help this person last

\_\_\_\_\_ A female cousin you are very close to emotionally, who has a 95% chance of being able to conceive a child.

\_\_\_\_\_ A female cousin you are not very close to emotionally, who has a 95% chance of being able to conceive a child.

\_\_\_\_\_ A female cousin you are very close to emotionally, who has a 95% chance of not being able to conceive a child.

\_\_\_\_\_ A female cousin you are not very close to emotionally, who has a 95% chance of not being able to conceive a child.

CANCEL

NEXT

In the spaces provided, please tell us a little about what you were thinking when deciding which cousin to help in order (e.g. the ranking you gave person and the way you felt about each person). This will help us better understand decision making in complex scenarios. Again, there are no right answers and your responses are completely confidential.

1) (participant's 1<sup>st</sup> choice will be displayed here)

2) (participant's 2<sup>nd</sup> choice will be displayed here)

3) (participant's 3<sup>rd</sup> choice will be displayed here)

4) (participant's 4<sup>th</sup> choice will be displayed here)

CANCEL

NEXT

**Study 3 (Friend/Cousin, 95% Chance of being able to conceive a child/95% Chance of not being able to conceive a child)**

**Life or Death Condition**

Please complete the following survey. There are no right or wrong answers; we are simply interested in getting a pool of responses. All your responses are confidential. No one will find out your response and it will not be identified in connection to your name.

Imagine the following scenario:

Imagine that four of your close friends and family members are asleep in a burning building and require your help to escape. If you do not help them, they will surely die. Imagine that you can only help one person at a time escape the building. The longer each member stays in the building without your help, the greater the chance they will die in the fire. Please read the descriptions of each person in the building. In the space next to the description, please rank each person from first (1) to last (4), in the order you will help them escape the building.

1 = help this person first; 2 = help this person second; 3 = help this person third; 4 = help this person last

- \_\_\_\_\_ A female cousin you are very emotionally close to; she has a 95% chance of being able to conceive a child.
- \_\_\_\_\_ A female friend you are very emotionally close to; she has a 95% chance of being able to conceive a child.
- \_\_\_\_\_ A female cousin you are very emotionally close to; she has a 95% chance of not being able to conceive a child.
- \_\_\_\_\_ A female friend you are very emotionally close to; she has a 95% chance of not being able to conceive a child.

CANCEL

NEXT

## Everyday help condition

Please complete the following survey. There are no right or wrong answers. We are simply interested in getting a pool of responses. All your responses are confidential. No one will find out your response and it will not be identified in connection to your name.

Imagine the following scenario:

Imagine that four of your close friends and family members require your help to run some important errands. If you do not help them, they will not be able to complete these tasks. You can only help one person at a time. The longer it takes you to help each person, the greater the chance they will not be able to complete their important errands. Please read the descriptions of each person. In the space next to the description, please rank each person from first (1) to last (4), in the order you will help them with their errands.

1 = help this person first; 2 = help this person second; 3 = help this person third; 4 = help this person last

- \_\_\_\_\_ A female cousin you are very emotionally close to; she has a 95% chance of being able to conceive a child.
- \_\_\_\_\_ A female friend you are very emotionally close to; she has a 95% chance of being able to conceive a child.
- \_\_\_\_\_ A female cousin you are very emotionally close to; she has a 95% chance of not being able to conceive a child.
- \_\_\_\_\_ A female friend you are very emotionally close to; she has a 95% chance of not being able to conceive a child.

CANCEL

NEXT
